# Supplementary material for: Mutations in PLA2G6 impair ER–mitochondria contacts and ceramide homeostasis via GRP75 in Parkinson’s disease
Source: Research Square preprint supplement (doi:10.21203/rs.3.rs-7426255/v1), 2025-08-22
Supplement: Supplementary file 1 [file b672f82a02c1aba8f81f2c55.docx]

# Supplementary materials

# Title: Mutations in *PLA2G6* impair ER–mitochondria contacts and ceramide homeostasis *via* GRP75 in Parkinson’s Disease

*Jiabin Liu1,2, Qiao Yin1, Rong Guo1, Taole Li1, Zuyan Xie2, Xiurong Huang1, Yuzhong Liu2, Lu Shen 1,5, Hong Jiang 1,3,5, Jiada Li 2, Jian Qiu 1,2, Xuejing Wang 6, Zhentao Zhang 7, Xiongwei Zhu 8, Beisha Tang 1,3,4,5, Jieqiong Tan 2*, Jifeng Guo 1,3,5,9**

1.Department of Neurology, Xiangya Hospital, Central South University, Changsha, Hunan, China

2.Centre for Medical Genetics and Hunan Key Laboratory of Medical Genetics, School of Life Sciences, Central South University, Changsha, Hunan, China.

3.Key Laboratory of Hunan Province in Neurodegenerative Disorders, Central South University, Changsha, Hunan, China

4.Department of Geriatrics, Xiangya Hospital, Central South University, Changsha, Hunan, China.

5.National Clinical Research Center for Geriatric Disorders, Xiangya Hospital, Central South University, Changsha, Hunan, China.

6.Department of Neurology, The First Affiliated Hospital of Zhengzhou University, Zhengzhou, Henan, China.

7.Department of Neurology, Renmin Hospital of Wuhan University, Wuhan, Hubei, China.

8.Department of Pathology, Case Western Reserve University, Cleveland, OH 44106.

9.Department of Neurology, The Second Affiliated Hospital of Xinjiang Medical University, Ürümqi, China.

* The corresponding authors

Jifeng Guo: [guojifeng@csu.edu.cn](mailto:guojifeng@csu.edu.cn); guojifeng2003@163.com

Jieqiong Tan: [tanjieqiong@sklmg.edu.cn](mailto:tanjieqiong@sklmg.edu.cn)


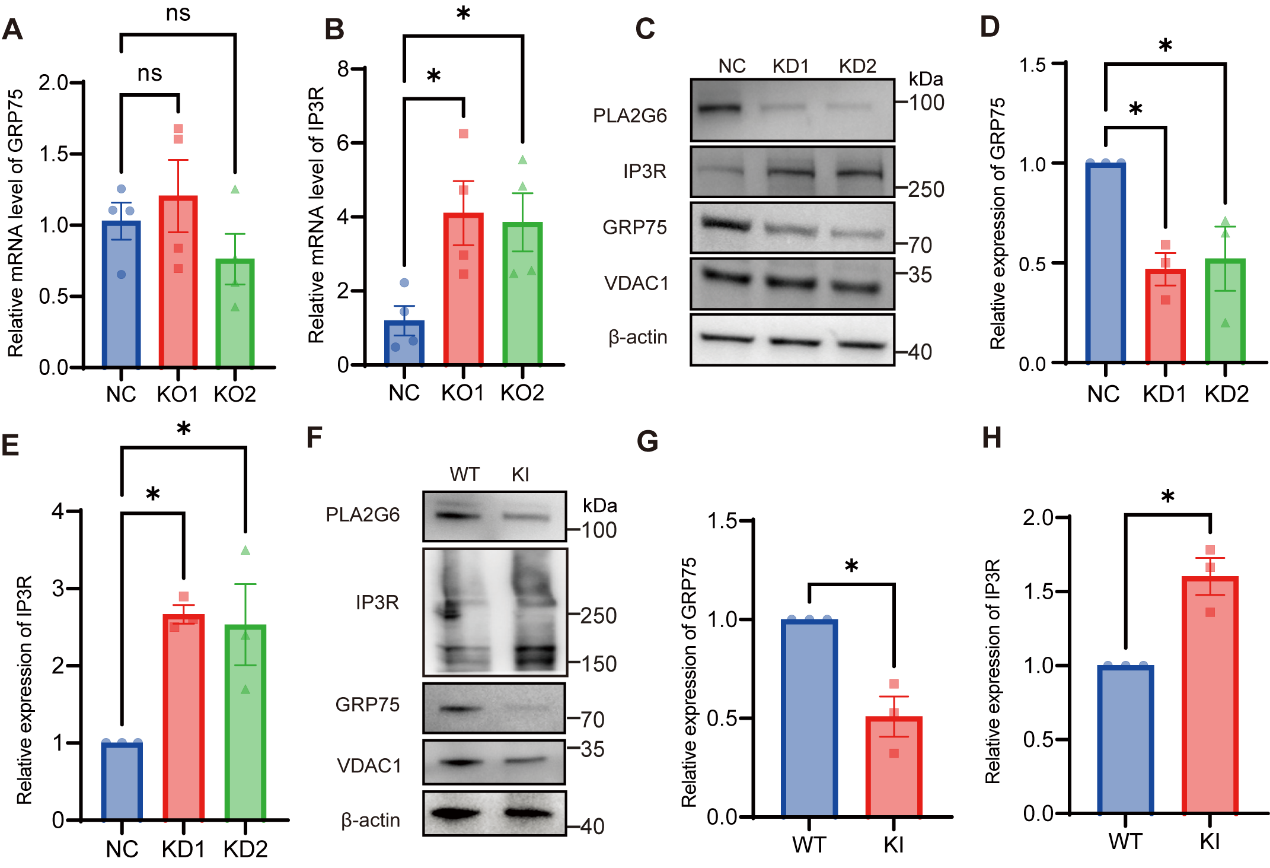


Figure S1 Expression analysis of VDAC1, GRP75, and IP3R in *vitro*.

(A-B) qPCR analysis of GRP75 and IP3R in HEK293 cells. Ns: not significant,

(C) Western blot of PLA2G6, IP3R, GRP75, VDAC1, and β-actin (loading control) in NC and PLA2G6 KD SH-SY5Y cells.

(D, E) Quantitative analysis of GRP75 (B) and IP3R (C) in total cell lysates from NC and PLA2G6 KD SH-SY5Y cells.

(F) Western blot of PLA2G6, IP3R, GRP75, VDAC1, and β-actin (loading control) in WT and KI MEF cells.

(G-H) Quantitative analysis of GRP75 (E) and IP3R (F) in total cell lysates from WT and KI MEF cells.

Error bars represent SEM; *p<0.05, **p<0.01 by one-way ANOVA with Dunnett's multiple comparisons test (A-B, D-E) or two tailed paired Student’s t test (G-H).


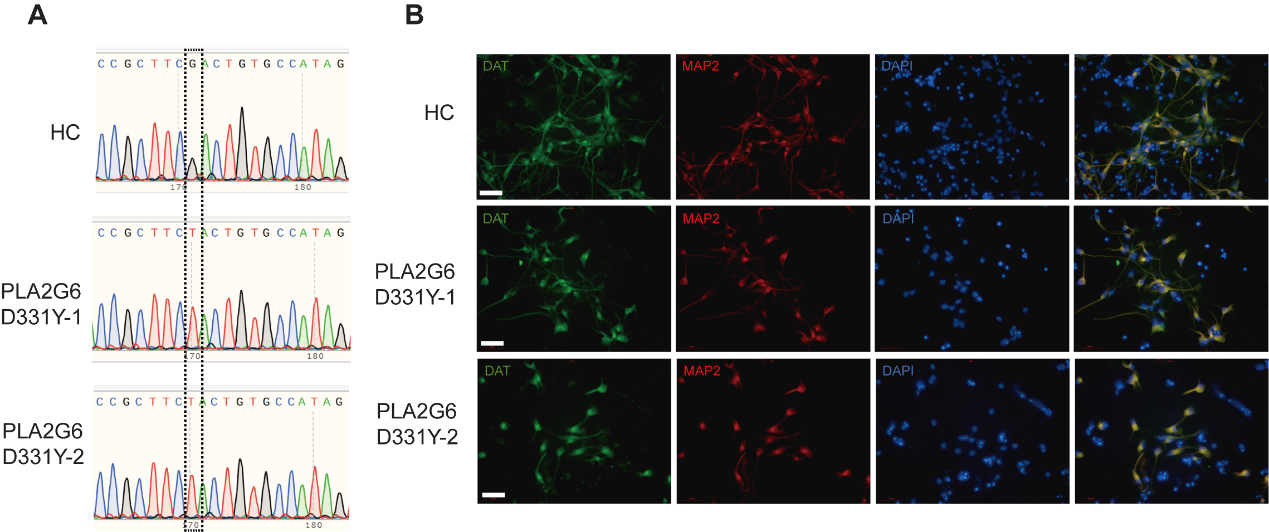


Figure S2 Dopaminergic neurons from healthy control and two patients carrying *PLA2G6* D331Y mutation.

(A) Sanger sequencing of cDNA synthesized from the Blood of Healthy control and Patients . The (G991 →T991) nucleotide mutation at the residue D331 (D331 (GAC) → Y331 (TAC) of PLA2G6.

(B) Immunofluorescence of iPSC-derived dopaminergic (DA) neurons at Day 28. Neurons were co-stained for the DA marker dopamine transporter (DAT, green), the neuronal marker MAP2 (red) and the nuclear dye DAPI (blue). Robust DAT⁺/MAP2⁺ neurites are evident in HC as well as both patient lines, indicating efficient DA differentiation. Scale bar, 50 µm.


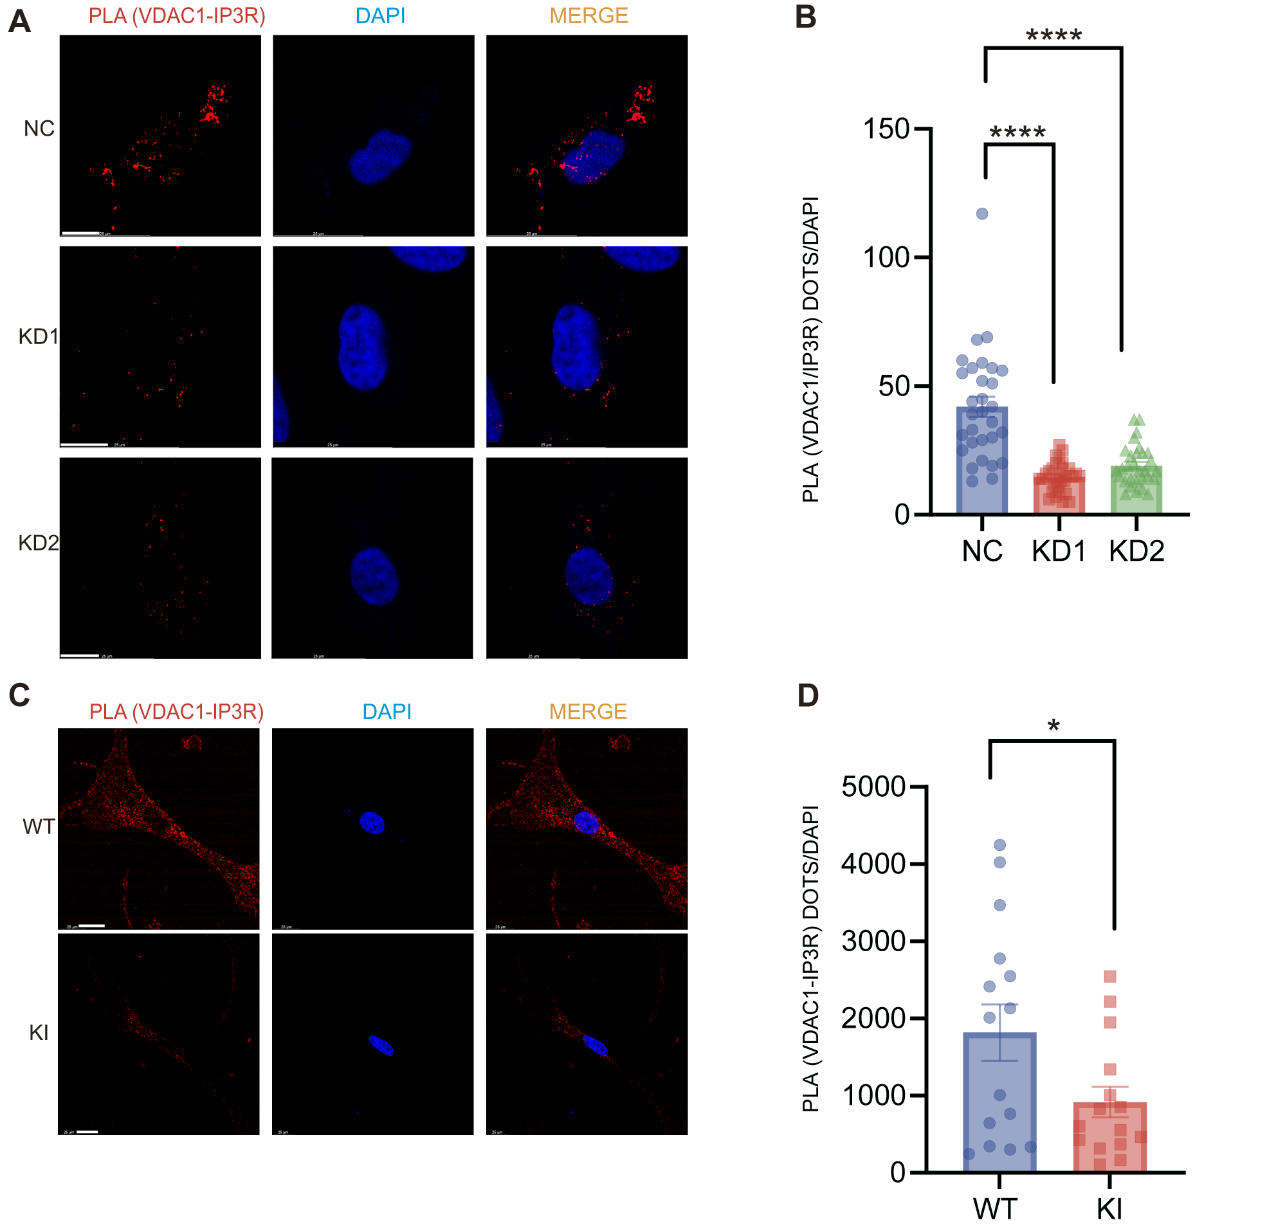


Figure S3 Proximity ligation assay (PLA) of VDAC1-IP3R interaction and quantitative analysis in control and PLA2G6 deficient cell

(A) Representative PLA fluorescence images showing VDAC1-IP3R interaction (red) in NC, knockdown 1 (KD1), and knockdown 2 (KD2) cells, with DAPI staining for nuclei (blue). (Scale bars,10 μm)

(B) Quantitative analysis of PLA signals (VDAC1-IP3R interaction spots per cell) in NC, KD1, and KD2 groups.

(C) Representative PLA fluorescence images for WT and KI MEF cells. (Scale bars, 25 μm)

(D) Quantitative analysis of PLA signals in WT and KI MEF cells.

Error bars represent SEM; *p < 0.05, ****p < 0.0001 by Brown-Forsythe ANOVA test with Dunnett's multiple comparisons test (B) or two tailed unpaired Student’s t test (D).


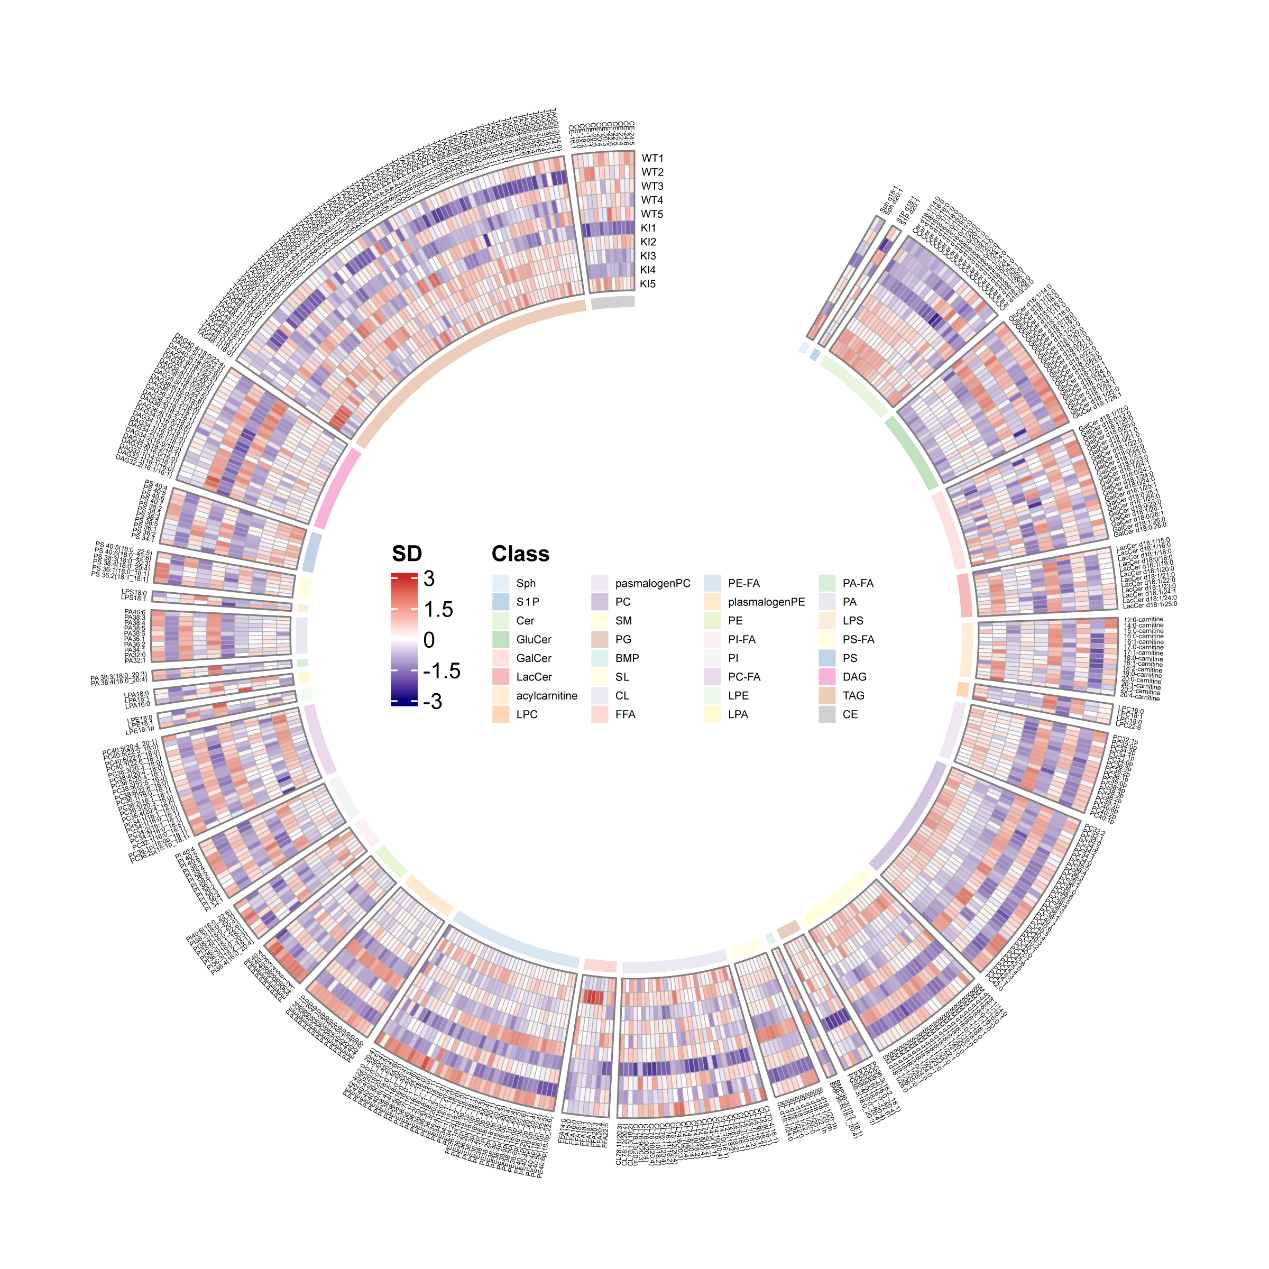


Figure S4 Heatmap representation of lipidomic analysis on the midbrains of WT and KI mice.

The radial heatmap that arranges 483 lipid species around the circumference; each name is rotated so it follows the circle. Just inside these labels lie ten thin, concentric data rings—five for wild-type samples (WT1-WT5) and five for knock-in samples (KI1-KI5). For every lipid, the tile colour in each ring shows its z-scored abundance, shifting from deep blue (-3 SD) through white (0) to deep red (+3 SD).


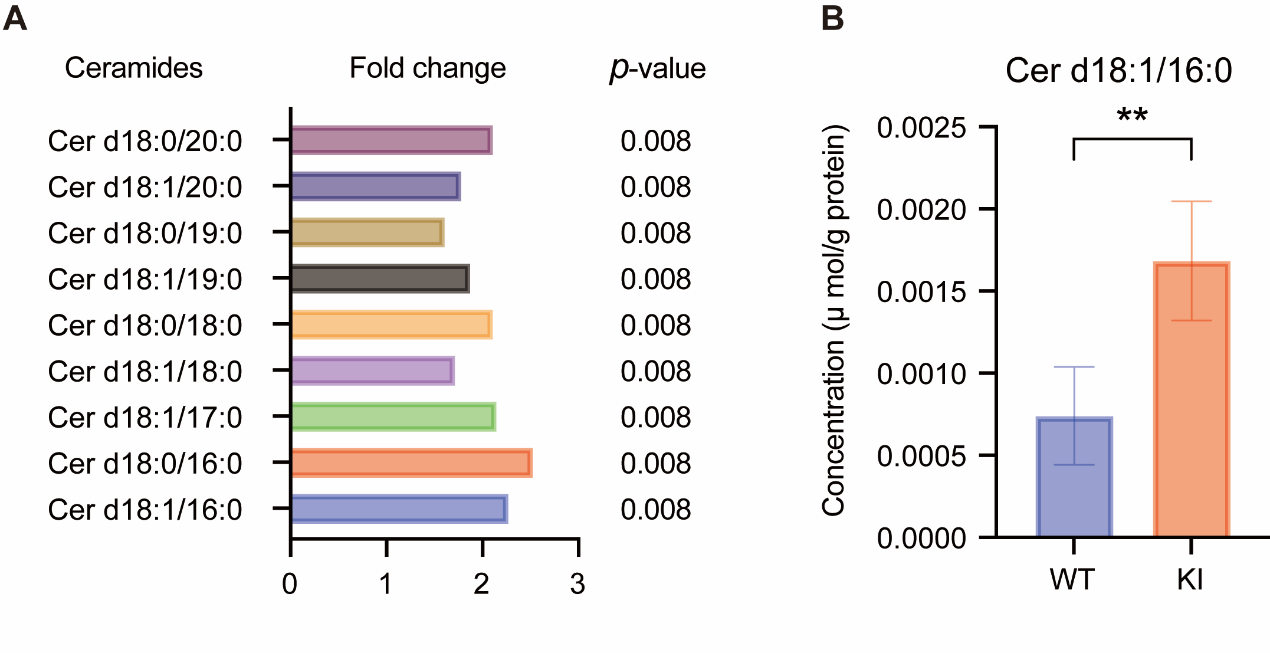


Figure S5 Quantitative analysis of ceramide species alterations between WT and KI mice.

(A) Bar graph depicting the top altered ceramides in KI mice compared to WT mice, shown as fold change with corresponding p-values, indicating statistically significant differences. Cer: ceramide.

(B) Bar plot representing the concentration of C16 ceramide (Cer d18:1/16:0) in WT and KI mice.

Error bars represent SEM, **p < 0.01 by Mann-Whitney U test.


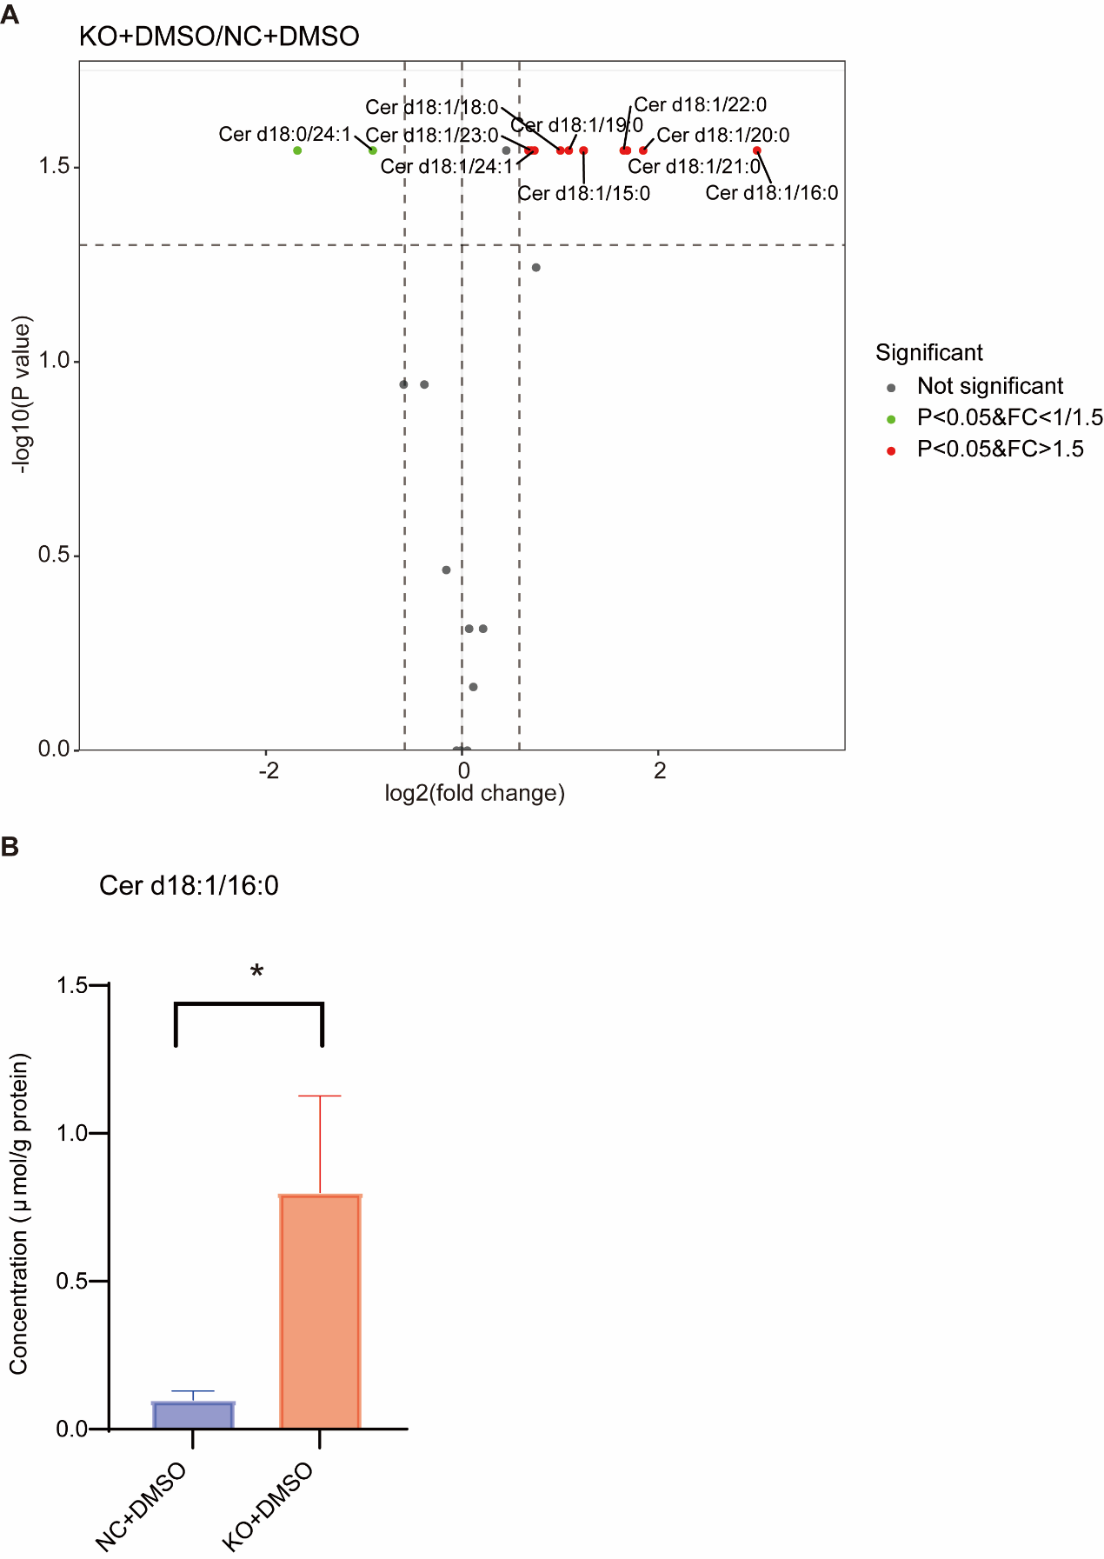


Figure S6 Ceramide species differential concentration in *PLA2G6* KO versus NC cells treated with DMSO.

(A) Volcano plot illustrating the log2(fold change) and -log10(p-value) of ceramide species. Points above the threshold lines indicate significant changes, with red points representing a significant increase (p < 0.05 and fold change > 1.5) and green points a significant decrease in the KO+DMSO group compared to the NC+DMSO group.

(B) Bar graph showing the concentration of Cer d18:1/16:0 in NC+DMSO and KO+DMSO groups.

Error bars represent SEM, *p < 0.05 Mann-Whitney U test.


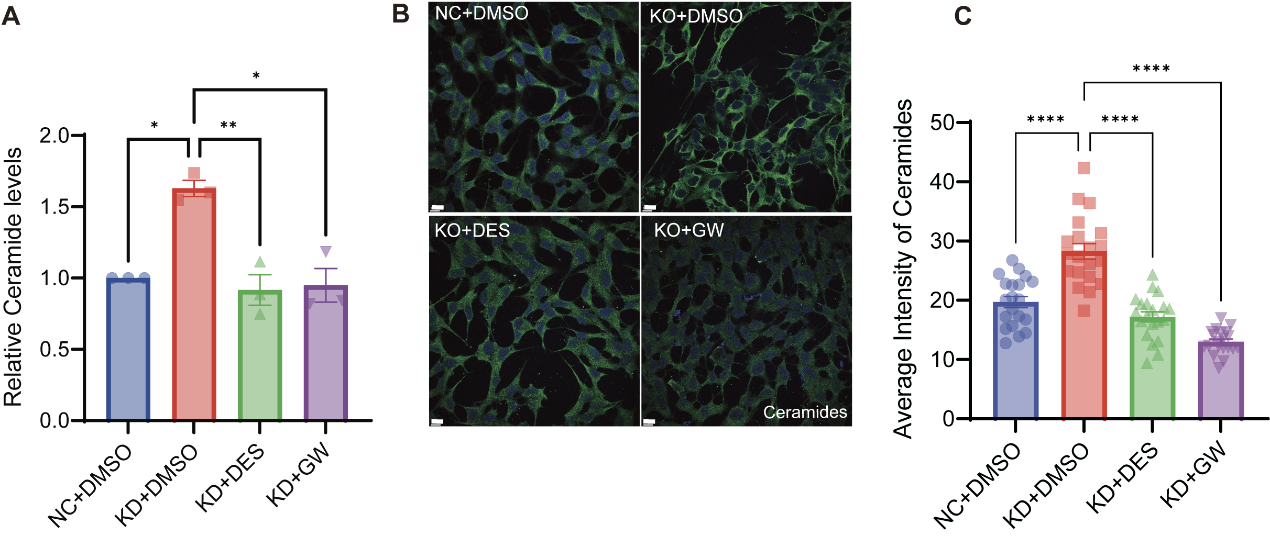


Figure S7 Analysis of ceramide levels in SH-SY5Y cells.

(A) ELISA analysis of ceramide fold-change under the different treatments on SH-SY5Y cell lines.

(B) Representative immunostaining of ceramides (green) in SH-SY5Y cell lines. (Scale bar, 10 μm)

(C) Quantitative analysis of immunofluorescent intensity for ceramides in different groups of DAs (n = 20 per group).

Error bars represent SEM; **p<0.01, ***p<0.001, ****p<0.0001 by one-way ANOVA with Dunnett's multiple comparisons test (A) or Brown-Forsythe and Welch ANOVA tests with Dunnett's multiple comparisons test (C)


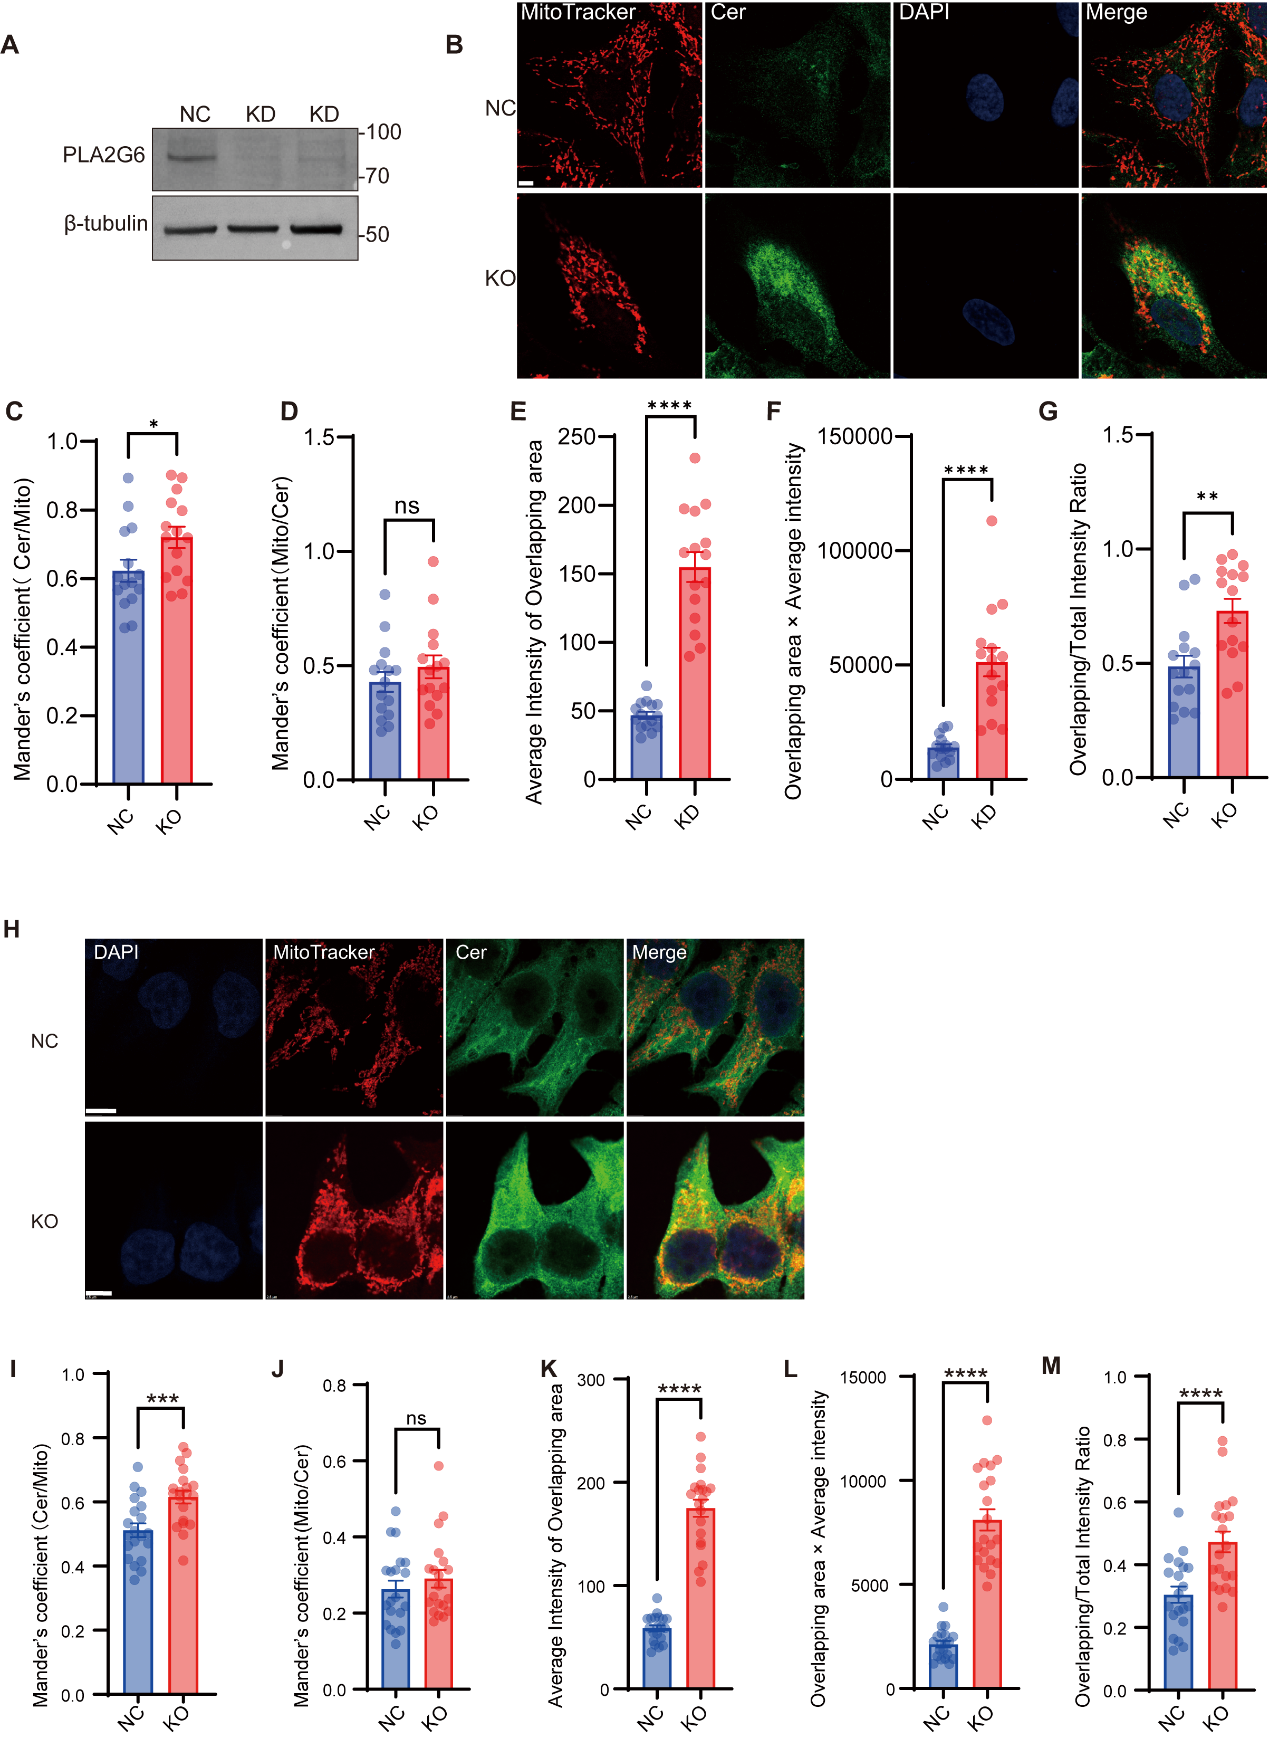


Figure S8 Ceramide accumulation in mitochondria

(A) Western blot of PLA2G6 and β-tubulin (loading control) in PLA2G6 NC and KD U2OS cells.

(B) Representative immunofluorescence of MitoTracker (mitochondria, red), and ceramide (Cer, green) staining in NC and KD cells. Merged images reveal increased colocalization of ceramide with mitochondria in KD cells compared to NC cells. (Scale bar, 10 μm)

(C-D) Mander’s coefficient indicating colocalization between ceramide and mitochondria (Cer/Mito or Mito/Cer) in NC and KD cells.

(E) Quantification of the average intensity of the overlapping area between mitochondria and ceramide.

(F) Quantification of Total ceramide intensity inside the overlapping area (overlapping area multiplied by the average intensity of the overlap between ceramide and mitochondria).

(G) Ratio of the ceramide content in the overlapping area to the total intensity of ceramide.

(H) Representative immunofluorescence of MitoTracker (mitochondria, red), and ceramide (Cer, green) staining in HEK293 NC and KO cells. Merged images reveal increased colocalization of ceramide with mitochondria in KO cells compared to NC cells. (Scale bar, 5 μm)

(I-J) Mander’s coefficient indicating colocalization between ceramide and mitochondria (Cer/Mito or Mito/Cer) in NC and KO cells.

(K) Quantification of the average intensity of the overlapping area between mitochondria and ceramide.

(L) Quantification of total ceramide intensity inside the overlapping area (overlapping area multiplied by the average intensity of the overlap between ceramide and mitochondria).

(M) Ratio of the ceramiade content in the overlapping area to the total intensity of ceramide.

Error bars represent SEM; *p<0.05, ** p<0.01, ****p<0.0001 by two tailed unpaired Student’s t test (C, D, G, I, J, M)) or by two tailed Welch’s t test (E-F, K).


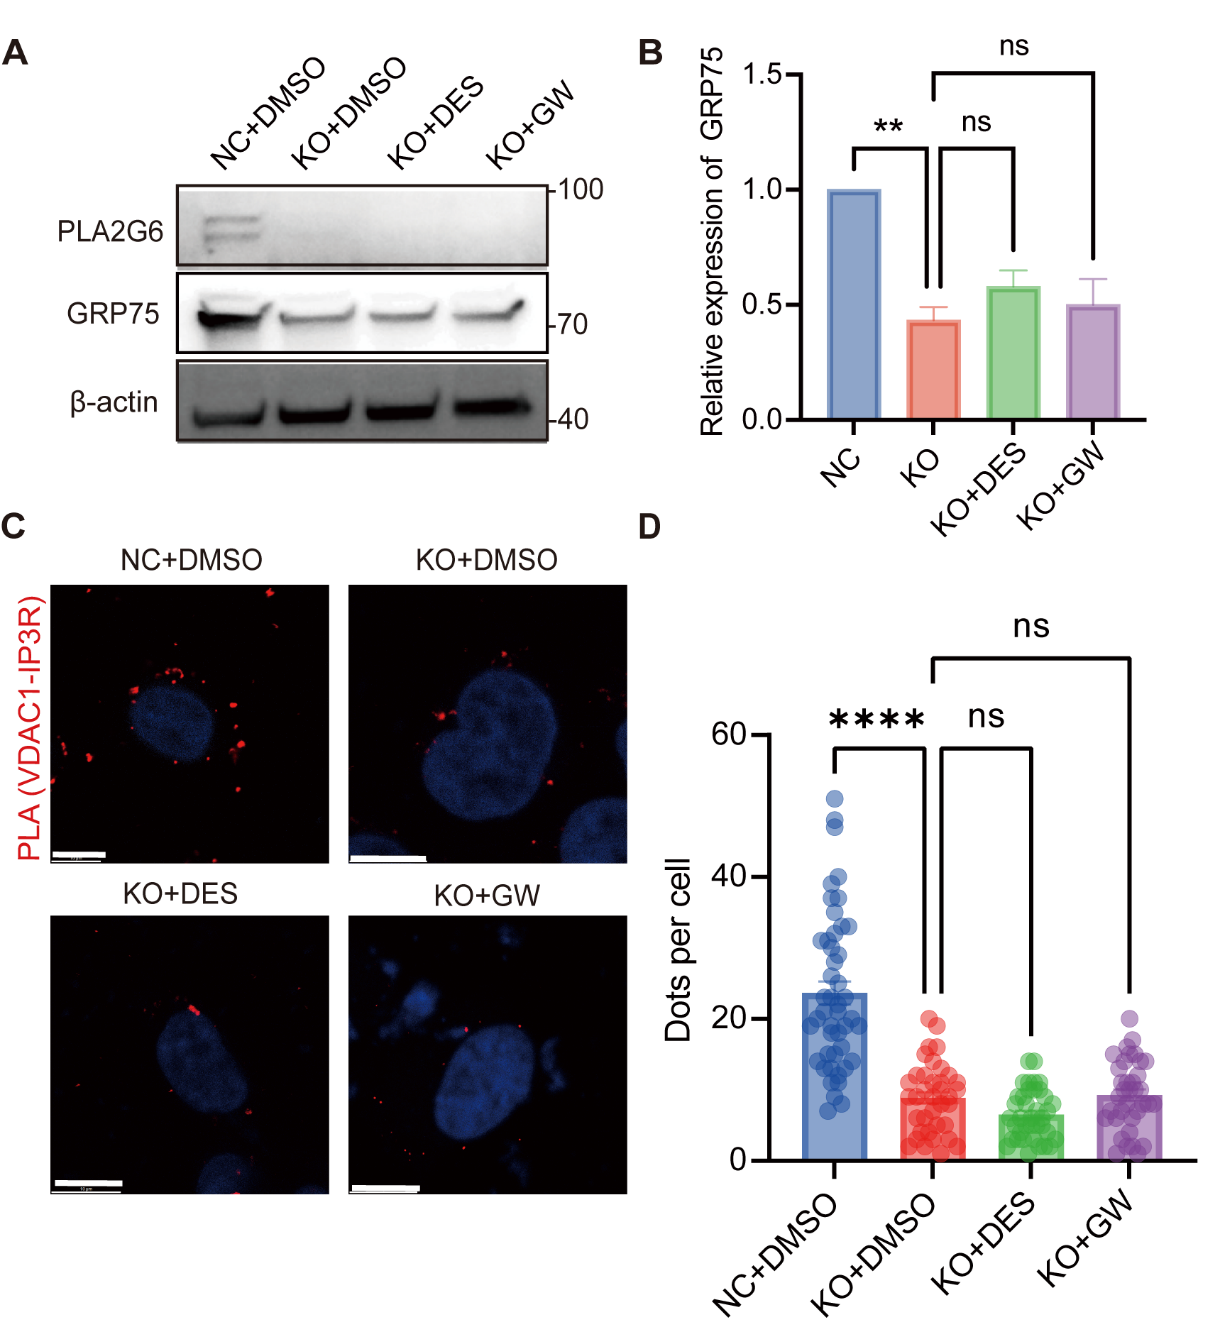


Figure S9 Effects of DES and GW treatments on GRP75 expression and VDAC1-IP3R interaction in *PLA2G6* KO cell lines compared to control.

(A) Western blot of PLA2G6 and GRP75 in NC cells treated with DMSO (NC+DMSO), *PLA2G6* KO cells treated with DMSO (KO+DMSO), KO cells treated with DES (KO+DES), and KO cells treated with GW (KO+GW). β-actin serves as the loading control.

(B) Quantitative analysis of the relative expression of GRP75 normalized to β-actin across the treatments, indicating a significant decrease in KO+DMSO compared to NC+DMSO with treatments not reversing this effect.

(C) Representative PLA fluorescence images showing the interactions (red) between VDAC1 and IP3R in the cell lines, with DAPI staining the nuclei (blue). (Scale bars, 5 μm)

(D) Quantification of the PLA signals (red dots) per cell, showing a significant reduction in KO+DMSO compared to NC+DMSO, with treatments not reversing this effect.

Error bars represent SEM; ns: not significant, **p < 0.01, ****p < 0.0001 by one-way ANOVA with Dunnett's multiple comparisons test (B) or Brown-Forsythe ANOVA test with Dunnett's multiple comparisons test (D).


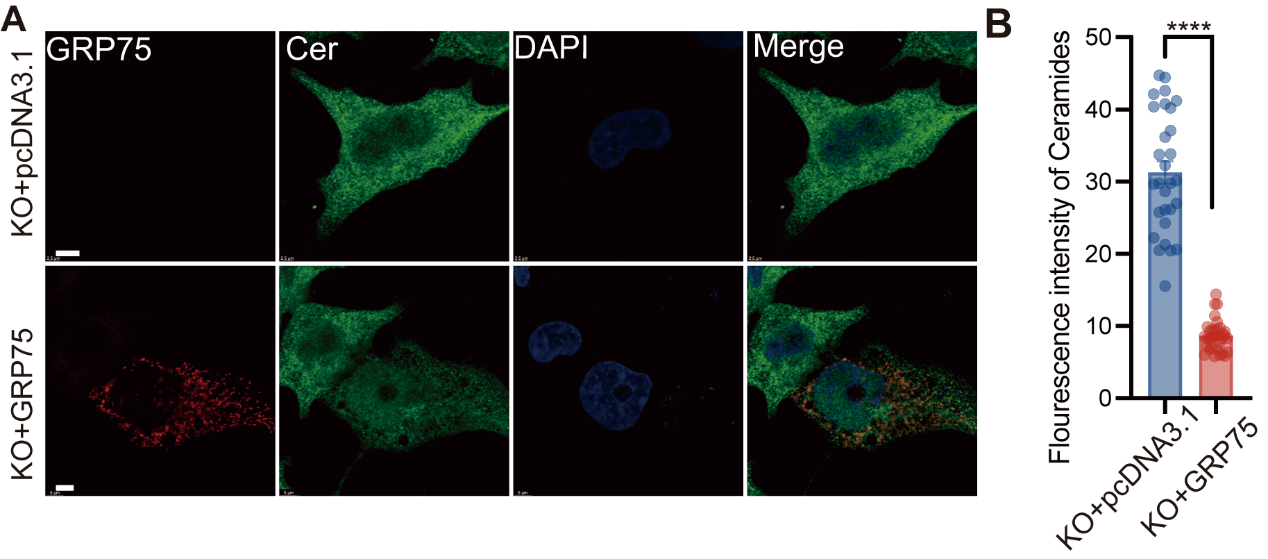


Figure S10 Effect of GRP75 over-expression on ceramide levels

(A) Representative Immunofluorescence of ceramide in PLA2G6 KO cells with and without GRP75 overexpression. (Scale bar, 5 μm)

(B) Quantification of ceramide immunofluorescence in PLA2G6 KO cells transfected with pcDNA3.1 (n=29) or pcDNA3.1_GRP75 plasmids (n=33)

Error bars represent SEM; ****p<0.0001 by two tailed Welch’s t test (B)


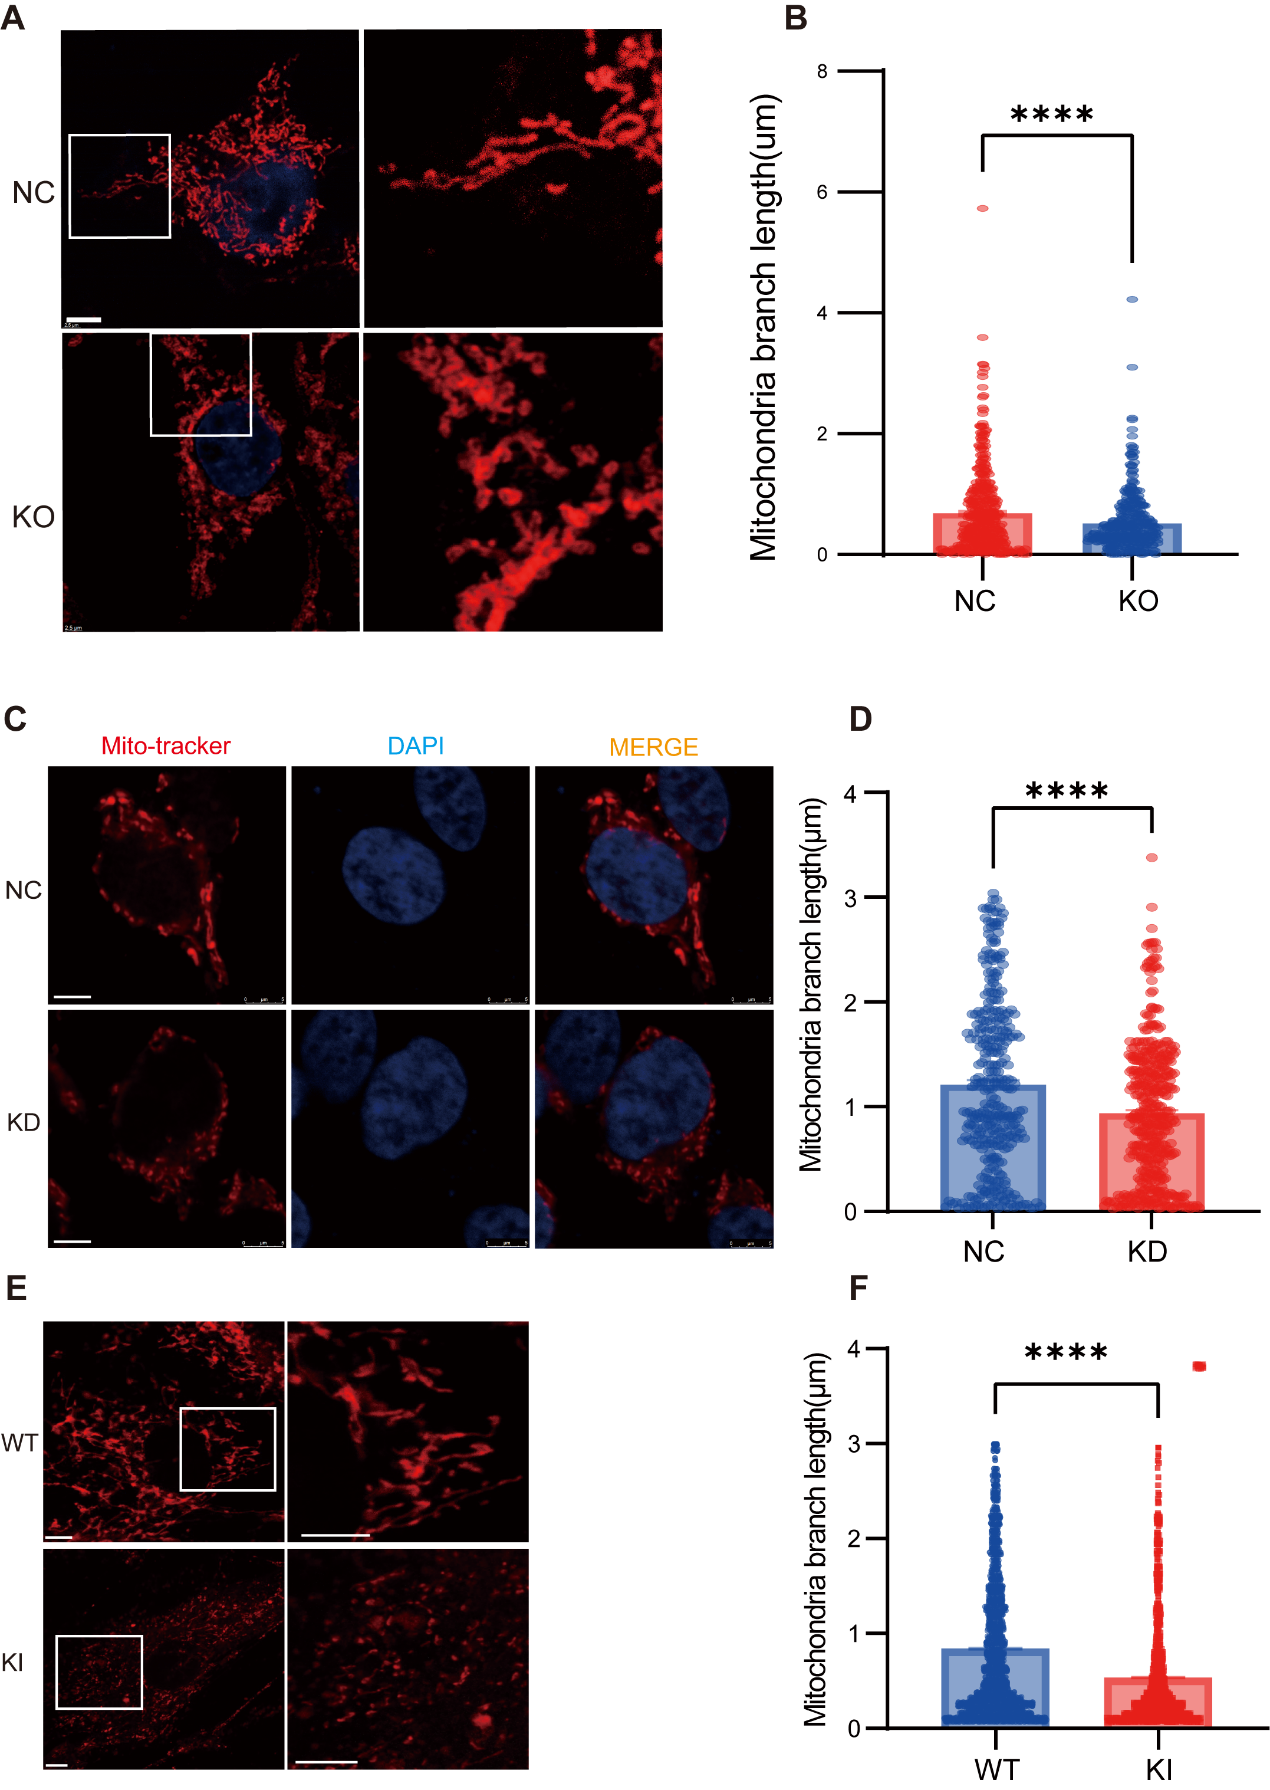


Figure S11 Mitochondrial morphology in different cell lines.

(A) Images of the mitochondrial structure in NC and PLA2G6 KO HEK293 cells stained with MitoTracker (red). (Scale bars, 5 μm)

(B) Quantitative analysis of the average branch length of mitochondria in NC and KO cells.

(C) Images of the mitochondrial structure in NC and *PLA2G6* KD SH-SY5Y cells stained with MitoTracker (red). (Scale bars, 5 μm)

(D) Quantitative analysis of the average branch length of mitochondria in NC and KD cells.

(E) Images of the mitochondrial structure in WT and KI MEF cells stained with MitoTracker (red). (Scale bars, 10 μm)

(F) Quantitative analysis of the average branch length of mitochondria in WT and KI cells.

Error bars represent SEM; ****p < 0.0001 by two tailed Welch’s t test (B, D, F).


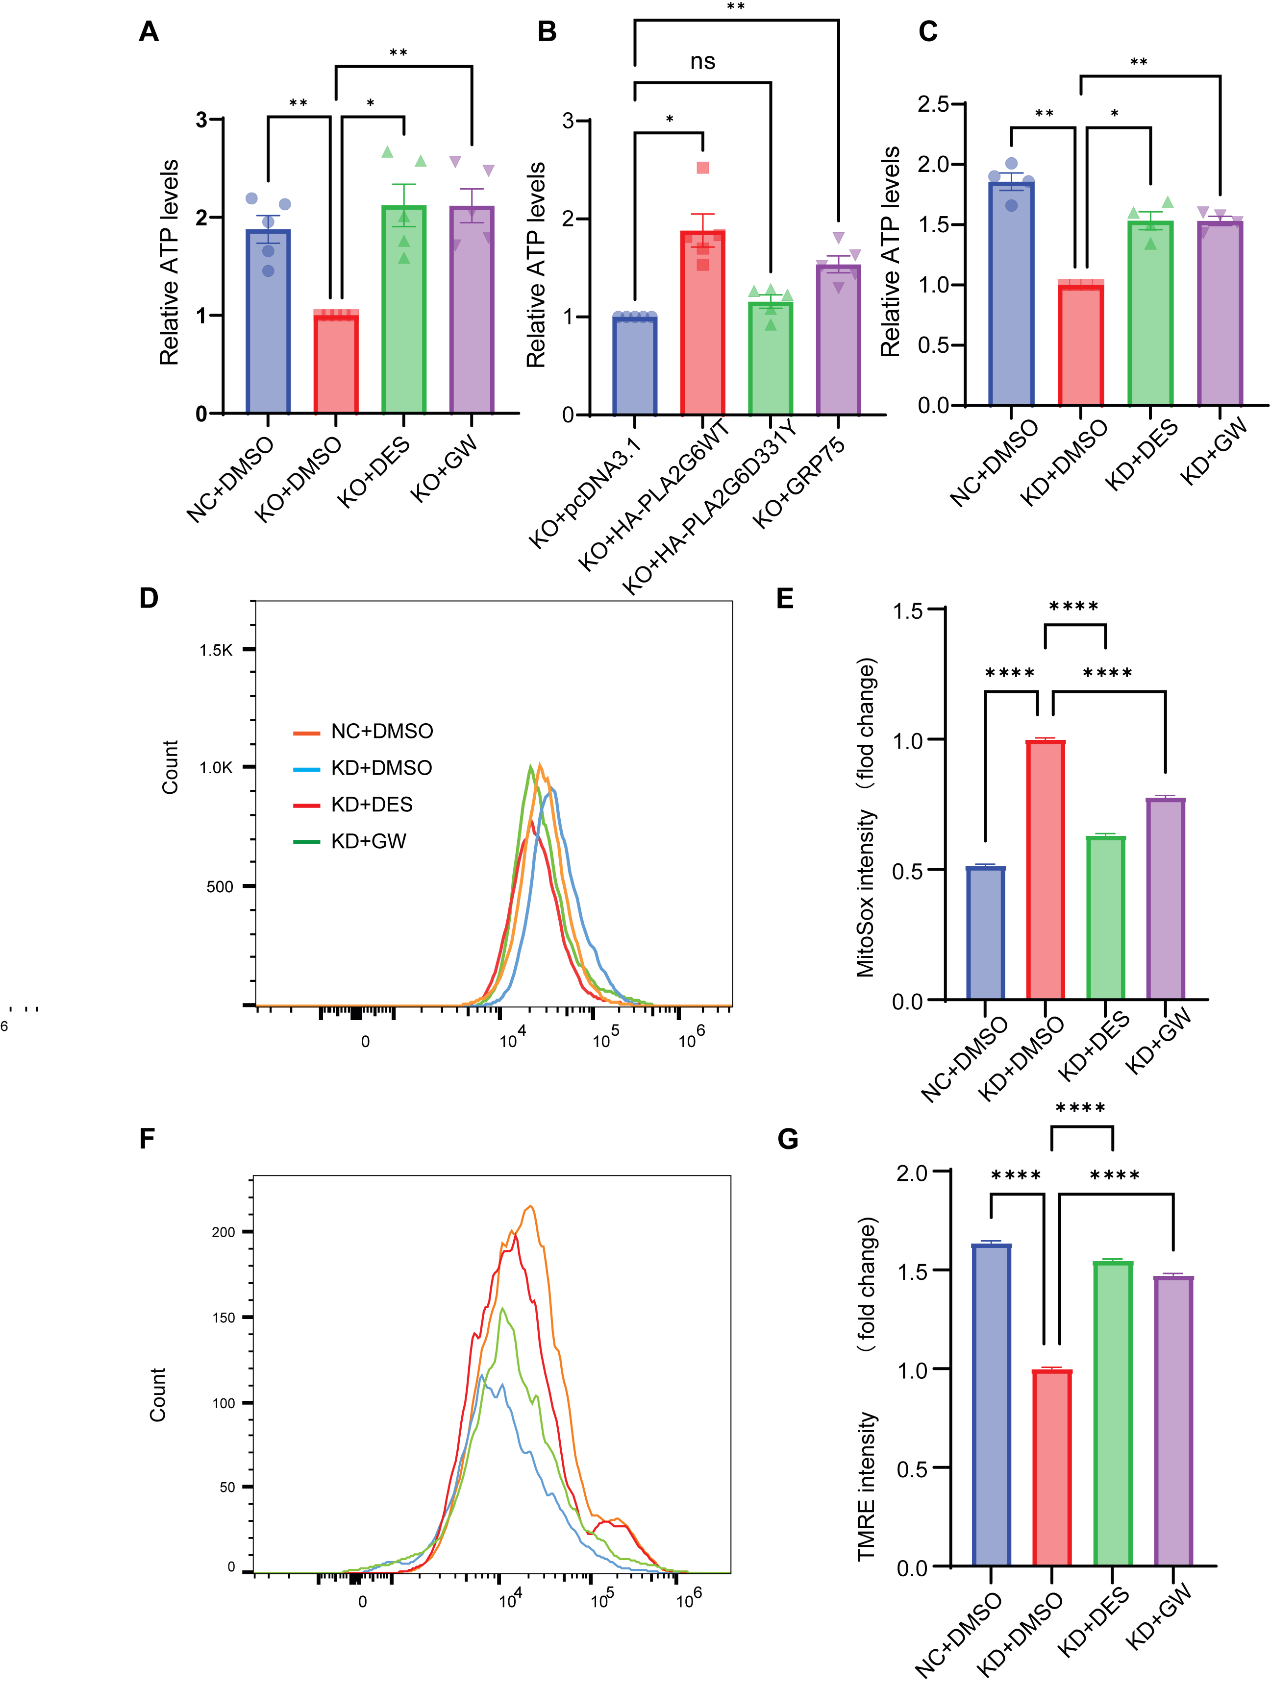


Figure S12. ATP production, mitochondrial ROS, and membrane potential in PLA2G6-deficient cells.

(A) Luminescence-based assay of intracellular ATP in HEK293 cells, inculding control cells (NC + DMSO) and PLA2G6 KO cells cultured with vehicle (KO + DMSO) or the drugs: desipramine (KO + DES) and GW4869 (KO + GW).
(B) ATP levels in KO cells transfected with empty vector (KO + pcDNA3.1) or over-expressing WT PLA2G6 (KO + HA-PLA2G6 WT), the pathogenic D331Y variant (KO +HA-PLA2G6 D331Y), or GRP75 (KO + GRP75).

(C) ATP quantification in SH-SY5Y cells, including normal-control cells (NC + DMSO) and PLA2G6-knock-down cells treated with vehicle (KD + DMSO) or DES (KD + DES) or GW4869 (KD + GW).
(D) Flow-cytometry histograms of MitoSOX fluorescence for the four SH-SY5Y groups.
(E) Fold-change analysis of MitoSOX mean fluorescence intensity across four groups.
(F) Flow-cytometry histograms of TMRE for the same groups.
(G) Fold-change analysis of TMRE mean fluorescence intensity.

Error bars represent SEM; *p<0.05, **p<0.01, ****p<0.0001 by One way ANOVA test with Dunnett's multiple comparisons test (A, B, and C) or Brown-Forsythe and Welch ANOVA tests with Dunnett's multiple comparisons test (E and G).


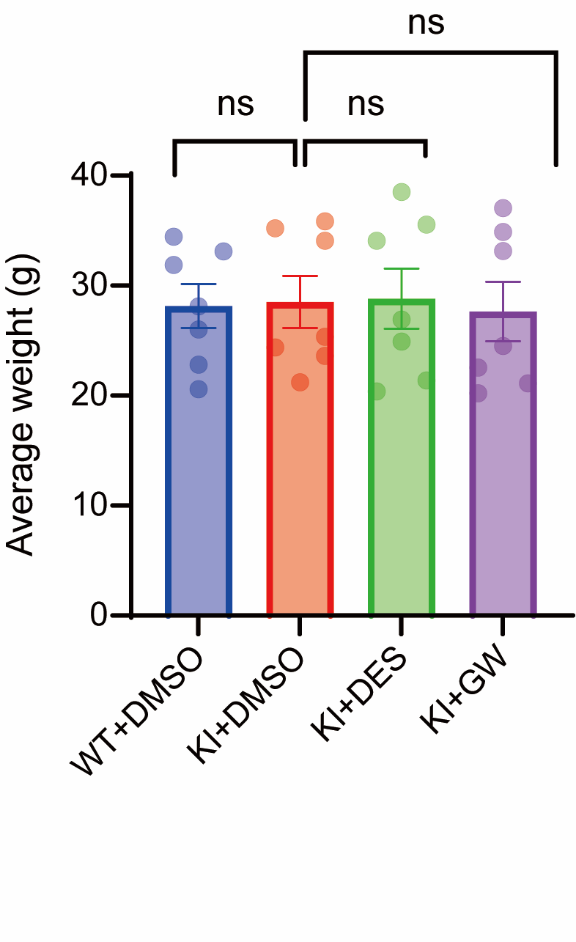


Figure S13 Average body weight comparison among different treatment groups in mice.

The bar graph represents the average body weight (g) of WT mice treated with DMSO (WT+DMSO), KI mice treated with DMSO (KI+DMSO), KI mice treated with DES (KI+DES), and KI mice treated with GW (KI+GW).

Error bars represent SEM; ns, not significant by one-way ANOVA with Dunnett's multiple comparisons test.


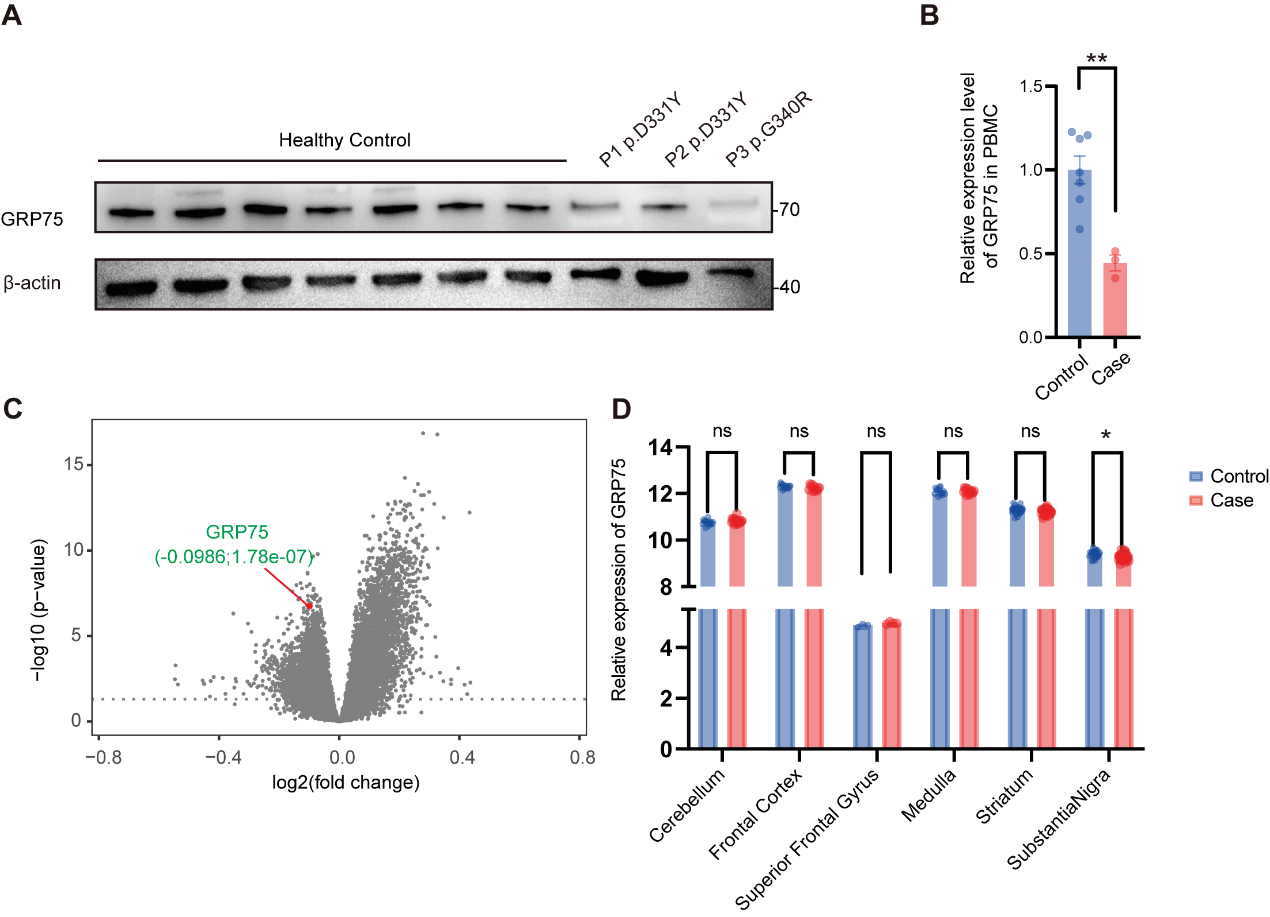


Figure S14 Altered GRP75 expression level in PD patients.

(A) Western blot analysis showing protein expression levels of GRP75 in peripheral blood mononuclear cells (PBMCs) from healthy controls (n=6) and patients (n=3) with specific PLA2G6 gene mutations ( c.991A>G, p.D331Y; and c.1018G>A, p.G340R).

(B) Quantitative analysis of GRP75 level in the PBMCs of PD patients harboring PLA2G6 mutations (n=3) and age-matched healthy controls (n=6).

(C) Volcano plot of genes differentially expressed between patients with PD and controls in whole blood from the PPMI cohort. The plot highlights GRP75 with a fold change of -0.0986 and a significant p-value of 1.78e-07 (indicated by the red dot).

(D) The mRNA expression data of GRP75 in different brain regions of PD patients and case controls from the BrainEXP-NPD database.

Error bars represent SEM; *p<0.05 by two tailed unpaired Student’s t test.
